# Supplementary material for: Detection method of flexion relaxation phenomenon based on wavelets for patients with low back pain
Source: Springer Nature journal article supplement (doi:10.1186/1687-6180-2012-151), 2012-07-19

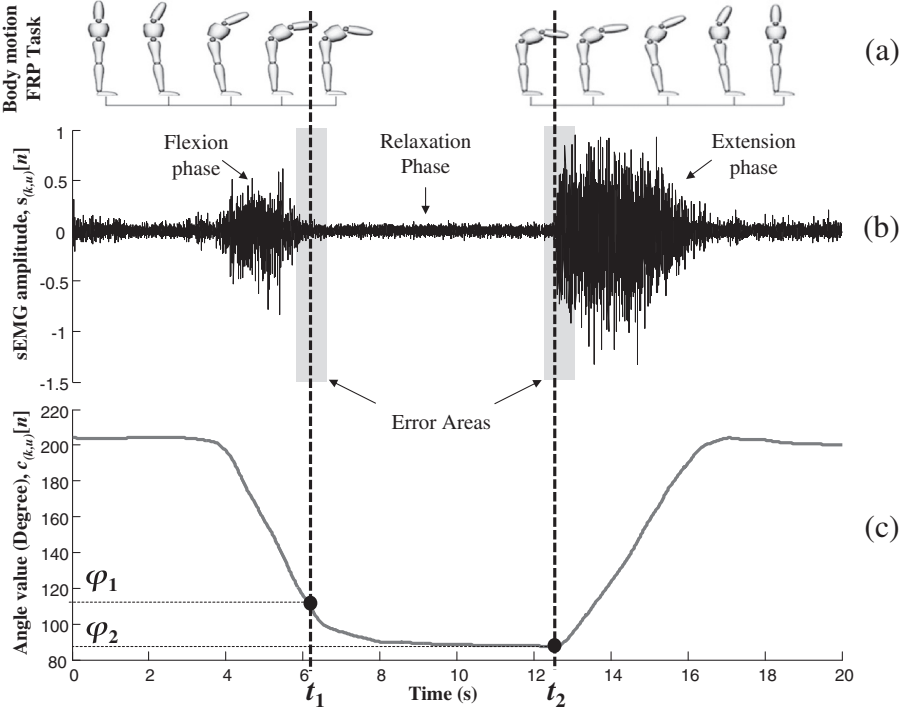

Supplement: 13634_2011_315_MOESM1_ESM.pdf [file 13634_2011_315_MOESM1_ESM.pdf]
