# Supplementary material for: Detection method of flexion relaxation phenomenon based on wavelets for patients with low back pain
Source: Springer Nature journal article supplement (doi:10.1186/1687-6180-2012-151), 2012-07-19
Supplement: 13634_2011_315_MOESM13_ESM.pdf [file 13634_2011_315_MOESM13_ESM.pdf]

Table 1: Detection methods studied and their main properties.

| Method named     | EMG Signal processing | FRP Shaping                    | Detection             |
|------------------|-----------------------|--------------------------------|-----------------------|
| <i>Visual</i>    | N/A                   | N/A                            | Visually and Manually |
| <i>MonoWind</i>  | No wavelet transform  | Based on one moving window     | N/A                   |
| <i>MultiWind</i> | No wavelet transform  | Based on several moving window | N/A                   |
| <i>WPT/med</i>   | WPT                   | Based on several moving window | Eq. (16)              |
| <i>WPT/mean</i>  | WPT                   | Based on several moving window | Eq. (15)              |
| <i>DWT/med</i>   | DWT                   | Based on several moving window | Eq. (16)              |
| <i>DWT/mean</i>  | DWT                   | Based on several moving window | Eq. (15)              |

Table 2: Parameters used for wavelet transform, shaping methods and limits detection.

| Wavelets Parameters                              | Values                                                                                          |
|--------------------------------------------------|-------------------------------------------------------------------------------------------------|
| Number of levels ( $J$ )                         | 4                                                                                               |
| Number of DWT sub-signals ( $N_s$ )              | 4                                                                                               |
| Number of WPT sub-signals ( $N_s$ )              | 30                                                                                              |
| Wavelet type                                     | Haar                                                                                            |
| Shaping Parameters                               | Values                                                                                          |
| Number of multi-windows ( $V$ )                  | 4                                                                                               |
| Sizes of multi-windows method ( $\Theta_{(v)}$ ) | $\Theta_{(1)} = 0.6s$ , $\Theta_{(2)} = 0.8s$ , $\Theta_{(3)} = 1.6s$ , and $\Theta_{(4)} = 2s$ |
| Size of one-window method                        | $\Theta_{(1)} = 0.6s$                                                                           |
| Determinations Parameters                        | Values                                                                                          |
| Threshold values                                 | $\gamma_1 = 0.2$ and $\gamma_2 = 0.2$                                                           |
